# Supplementary material
Source: MDPI journal article supplement (https://www.mdpi.com/2073-4433/13/4/560)
Supplement: s1 [file s1]

# Supplemental Materials

## Characterization of VOCs during Nonheating and Heating Periods in the Typical Suburban Area of Beijing, China: Sources and Health Assessment

Bi'an Zhou <sup>1,2</sup>, Tianyi Zhao <sup>1,2</sup>, Jian Ma <sup>1,2</sup>, Yuanxun Zhang <sup>1,2,3</sup>, Lijia Zhang <sup>4</sup>, Peng Huo <sup>1,2</sup> and Yang Zhang <sup>1,2,3,\*</sup>

<sup>1</sup> College of Resources and Environment, University of Chinese Academy of Sciences, Beijing 100049, China; zhoubian19@mailsucas.ac.cn (B.Z.); zhaotianyi19@mailsucas.ac.cn (T.Z.); majian19@mailsucas.ac.cn (J.M.); yxzhang@ucas.edu.cn (Y.Z.); huopeng@ucas.ac.cn (P.H.)

<sup>2</sup> Beijing Yanshan Earth Critical Zone National Research Station, Chinese Academy of Sciences, Beijing 101400, China

<sup>3</sup> National Engineering Laboratory for VOCs Pollution Control Material & Technology, Beijing 101400, China

<sup>4</sup> Resource and Environmental Branch, China National Institute of Standardization, Haidian District, Beijing 100191, China; zhanglij@cns.ac.cn (L.Z.)

\* Correspondence: zhangyang@ucas.ac.cn (Y.Z.); Tel.: +86-10-6967-2963

**Table S1.** List of MDL, R<sup>2</sup> and RSD of VOCs species.

| Groups           | Species                | MDL (ppbv) | R <sup>2</sup> | RSD (%) |
|------------------|------------------------|------------|----------------|---------|
| Alkanes          | Ethane                 | 0.025      | 0.996          | 12.25   |
|                  | Propane                | 0.034      | 0.999          | 7.69    |
|                  | Isobutane              | 0.015      | 0.999          | 5.96    |
|                  | n-Butane               | 0.006      | 0.999          | 5.27    |
|                  | Isopentane             | 0.013      | 0.998          | 5.81    |
|                  | n-Pentane              | 0.013      | 0.996          | 7.46    |
|                  | 2,2-Dimethylbutane     | 0.009      | 0.997          | 5.62    |
|                  | 2,3-Dimethylbutane     | 0.009      | 0.998          | 5.30    |
|                  | 2-Methylpentane        | 0.011      | 0.999          | 4.61    |
|                  | Cyclopentane           | 0.016      | 0.997          | 4.78    |
|                  | 3-Methylpentane        | 0.006      | 0.998          | 4.49    |
|                  | n-Hexane               | 0.005      | 0.998          | 4.28    |
|                  | 2,4-Dimethylpentane    | 0.012      | 0.996          | 4.95    |
|                  | Methylcyclopentane     | 0.009      | 0.998          | 5.82    |
|                  | 2-Methylhexane         | 0.013      | 0.997          | 7.36    |
|                  | Cyclohexane            | 0.010      | 0.997          | 7.47    |
|                  | 2,3-Dimethylpentane    | 0.016      | 0.995          | 5.02    |
|                  | 3-Methylhexane         | 0.010      | 0.996          | 4.77    |
|                  | 2,2,4-Trimethylpentane | 0.012      | 0.997          | 4.16    |
|                  | n-Heptane              | 0.012      | 0.997          | 6.50    |
|                  | Methylcyclohexane      | 0.013      | 0.998          | 3.95    |
|                  | 2,3,4-Trimethylpentane | 0.014      | 0.998          | 4.80    |
|                  | 2-Methylheptane        | 0.018      | 0.999          | 4.91    |
|                  | 3-Methylheptane        | 0.009      | 0.999          | 4.62    |
|                  | n-Octane               | 0.014      | 0.999          | 4.35    |
|                  | n-Nonane               | 0.006      | 0.996          | 6.38    |
|                  | n-Decane               | 0.014      | 0.995          | 10.95   |
|                  | n-Undecane             | 0.007      | 0.996          | 5.47    |
|                  | n-Dodecane             | 0.009      | 0.996          | 10.30   |
| Alkenes          | Ethylene               | 0.026      | 1.000          | 3.20    |
|                  | Propylene              | 0.024      | 0.999          | 5.50    |
|                  | 1-Butene               | 0.023      | 1.000          | 4.85    |
|                  | 1,3-Butadiene          | 0.013      | 1.000          | 4.89    |
|                  | trans-2-Butene         | 0.018      | 0.998          | 6.97    |
|                  | cis-2-Butene           | 0.015      | 0.997          | 6.50    |
|                  | 1-Pentene              | 0.022      | 0.996          | 10.31   |
|                  | trans-2-Pentene        | 0.012      | 0.995          | 11.19   |
|                  | cis-2-Pentene          | 0.015      | 0.995          | 5.62    |
|                  | Isoprene               | 0.014      | 0.995          | 6.41    |
| Alkynes          | 1-Hexene               | 0.009      | 0.998          | 4.78    |
|                  | Acetylene              | 0.020      | 0.999          | 4.61    |
| Halohydrocarbons | Freon-11               | 0.016      | 0.999          | 5.45    |
|                  | Freon-12               | 0.010      | 0.999          | 5.42    |

|           |                           |       |       |       |
|-----------|---------------------------|-------|-------|-------|
|           | Freon-113                 | 0.008 | 0.997 | 6.96  |
|           | Freon-114                 | 0.019 | 0.999 | 5.51  |
|           | Chloromethane             | 0.020 | 0.999 | 8.26  |
|           | Vinyl chloride            | 0.018 | 0.999 | 5.34  |
|           | Bromomethane              | 0.012 | 0.997 | 6.12  |
|           | Chloroethane              | 0.020 | 0.999 | 5.05  |
|           | Methylene chloride        | 0.015 | 0.999 | 7.07  |
|           | Trichloromethane          | 0.012 | 0.997 | 6.21  |
|           | Carbon tetrachloride      | 0.018 | 0.999 | 6.99  |
|           | 1,1-Dichloroethene        | 0.020 | 0.998 | 4.79  |
|           | 1,1-Dichloroethane        | 0.006 | 0.997 | 5.53  |
|           | trans-1,2-Dichloroethene  | 0.009 | 0.997 | 5.31  |
|           | cis-1,2-Dichloroethylene  | 0.015 | 0.997 | 5.83  |
|           | Trichloroethene           | 0.010 | 0.998 | 4.73  |
|           | Tetrachloroethene         | 0.010 | 0.999 | 4.52  |
|           | 1,1,1-Trichloroethane     | 0.021 | 0.998 | 7.46  |
|           | 1,2-Dichloroethane        | 0.011 | 0.999 | 8.99  |
|           | 1,2-Dichloropropane       | 0.021 | 0.998 | 4.66  |
|           | Dibromochloromethane      | 0.018 | 0.999 | 3.99  |
|           | Bromodichloromethane      | 0.011 | 0.999 | 4.26  |
|           | trans-1,3-Dichloropropene | 0.013 | 0.999 | 3.27  |
|           | cis-1,3-Dichloropropene   | 0.019 | 1.000 | 2.87  |
|           | 1,1,2-Trichloroethane     | 0.009 | 0.996 | 16.43 |
|           | Ethylene dibromide        | 0.007 | 0.999 | 3.22  |
|           | Chlorobenzene             | 0.009 | 0.999 | 2.71  |
|           | Bromoform                 | 0.008 | 0.997 | 10.73 |
|           | 1,1,2,2-Tetrachloroethane | 0.010 | 0.998 | 4.22  |
|           | 1,3-Dichlorobenzene       | 0.010 | 0.998 | 4.20  |
|           | 1,4-Dichlorobenzene       | 0.010 | 0.999 | 3.52  |
|           | Benzyl chloride           | 0.011 | 0.997 | 5.09  |
|           | 1,2-Dichlorobenzene       | 0.013 | 0.999 | 3.08  |
|           | 1,2,4-Trichlorobenzene    | 0.014 | 0.997 | 7.08  |
|           | Hexachloro-1,3-butadiene  | 0.007 | 0.995 | 17.19 |
| Aromatics |                           |       |       |       |
|           | Benzene                   | 0.008 | 0.998 | 6.95  |
|           | Toluene                   | 0.011 | 0.997 | 4.79  |
|           | Ethylbenzene              | 0.009 | 0.998 | 6.45  |
|           | m/p-Xylene                | 0.009 | 0.997 | 10.71 |
|           | o-Xylene                  | 0.007 | 0.996 | 9.02  |
|           | Styrene                   | 0.011 | 0.996 | 4.90  |
|           | Isopropylbenzene          | 0.013 | 0.996 | 5.97  |
|           | n-Propylbenzene           | 0.012 | 0.998 | 3.86  |
|           | p-Ethyltoluene            | 0.013 | 0.997 | 5.36  |
|           | m-Ethyltoluene            | 0.012 | 0.997 | 7.82  |
|           | 1,3,5-Trimethylbenzene    | 0.008 | 0.998 | 11.76 |
|           | o-Ethyltoluene            | 0.010 | 0.995 | 6.47  |
|           | 1,2,4-Trimethylbenzene    | 0.008 | 0.995 | 6.19  |
|           | 1,2,3-Trimethylbenzene    | 0.007 | 0.996 | 4.86  |
|           | m-Diethylbenzene          | 0.013 | 0.997 | 5.03  |
|           | p-Diethylbenzene          | 0.016 | 0.998 | 4.08  |

|       |                      |       |       |       |
|-------|----------------------|-------|-------|-------|
| OVOCs | Naphthalene          | 0.010 | 0.997 | 9.81  |
|       | Acetaldehyde         | 0.032 | 0.999 | 11.87 |
|       | Acrolein             | 0.019 | 0.999 | 3.41  |
|       | Propanal             | 0.013 | 0.998 | 12.60 |
|       | Acetone              | 0.008 | 0.999 | 9.17  |
|       | 2-Propanol           | 0.021 | 0.999 | 5.41  |
|       | MTBE                 | 0.010 | 0.998 | 4.33  |
|       | Methacrolein         | 0.022 | 0.998 | 4.52  |
|       | Vinyl acetate        | 0.009 | 0.997 | 4.17  |
|       | 2-Butanone           | 0.012 | 0.997 | 5.92  |
|       | Butanal              | 0.024 | 0.997 | 5.71  |
|       | Ethyl acetate        | 0.016 | 0.999 | 3.58  |
|       | Tetrahydrofuran      | 0.022 | 0.998 | 6.75  |
|       | 4-Methyl-2-pentanone | 0.012 | 0.997 | 6.50  |
|       | Crotonaldehyde       | 0.009 | 0.999 | 3.84  |
|       | Pentanal             | 0.016 | 0.999 | 2.75  |
|       | Methyl methacrylate  | 0.007 | 0.998 | 5.50  |
|       | 1,4-Dioxane          | 0.007 | 0.999 | 5.83  |
|       | 2-Hexanone           | 0.009 | 0.998 | 4.62  |
|       | Hexanal              | 0.017 | 0.999 | 4.20  |
| Other | Benzaldehyde         | 0.027 | 0.997 | 9.19  |
|       | m-Tolualdehyde       | 0.007 | 0.996 | 5.41  |
|       | Carbon disulfide     | 0.009 | 0.999 | 3.43  |

---

**Table S2.** Summary of PMF input data. Concentration units in ppbv.

| Species                | Category | S/N  | Min  | 25th | Median | 75th | Max  |
|------------------------|----------|------|------|------|--------|------|------|
| Acetylene              | Strong   | 2.32 | 0.10 | 0.38 | 0.70   | 1.15 | 4.21 |
| Ethylene               | Strong   | 2.31 | 0.10 | 0.32 | 0.57   | 1.23 | 4.26 |
| Propylene              | Strong   | 2.23 | 0.05 | 0.15 | 0.26   | 0.40 | 1.19 |
| Isoprene               | Strong   | 1.39 | 0.00 | 0.02 | 0.03   | 0.04 | 0.32 |
| Ethane                 | Strong   | 8.92 | 0.31 | 0.85 | 1.56   | 2.40 | 7.19 |
| Propane                | Strong   | 8.87 | 0.35 | 0.93 | 1.48   | 2.38 | 5.82 |
| Isobutane              | Strong   | 8.19 | 0.04 | 0.15 | 0.27   | 0.62 | 1.91 |
| n-Butane               | Strong   | 8.92 | 0.06 | 0.22 | 0.44   | 0.87 | 2.50 |
| n-Pentane              | Strong   | 8.04 | 0.04 | 0.10 | 0.19   | 0.50 | 2.04 |
| 2-Methylhexane         | Strong   | 3.50 | 0.00 | 0.02 | 0.03   | 0.05 | 0.67 |
| 3-Methylhexane         | Strong   | 3.76 | 0.00 | 0.01 | 0.03   | 0.05 | 0.18 |
| n-Decane               | Strong   | 2.26 | 0.00 | 0.01 | 0.02   | 0.03 | 0.16 |
| n-Undecane             | Strong   | 3.92 | 0.00 | 0.01 | 0.02   | 0.03 | 0.07 |
| n-Dodecane             | Strong   | 3.77 | 0.01 | 0.02 | 0.02   | 0.04 | 0.10 |
| Freon-11               | Strong   | 8.45 | 0.14 | 0.21 | 0.24   | 0.27 | 0.50 |
| Freon-12               | Strong   | 8.93 | 0.21 | 0.40 | 0.43   | 0.46 | 0.67 |
| Freon-114              | Strong   | 1.10 | 0.00 | 0.02 | 0.02   | 0.02 | 0.40 |
| Chloromethane          | Strong   | 8.10 | 0.01 | 0.17 | 0.24   | 0.34 | 0.74 |
| 1,1-Dichloroethane     | Strong   | 3.64 | 0.00 | 0.01 | 0.01   | 0.03 | 0.10 |
| Carbon tetrachloride   | Strong   | 5.76 | 0.05 | 0.08 | 0.08   | 0.09 | 0.17 |
| 1,2-Dichloroethane     | Strong   | 7.29 | 0.02 | 0.05 | 0.12   | 0.33 | 1.16 |
| 1,1,2-Trichloroethane  | Strong   | 4.06 | 0.01 | 0.02 | 0.03   | 0.03 | 0.09 |
| 1,2,4-Trichlorobenzene | Strong   | 2.57 | 0.01 | 0.02 | 0.02   | 0.04 | 0.40 |
| Carbon disulfide       | Strong   | 3.76 | 0.01 | 0.01 | 0.02   | 0.05 | 0.28 |
| Benzene                | Strong   | 8.81 | 0.08 | 0.17 | 0.29   | 0.56 | 1.78 |
| Toluene                | Strong   | 8.50 | 0.05 | 0.14 | 0.31   | 0.57 | 2.33 |
| Ethylbenzene           | Strong   | 6.75 | 0.01 | 0.03 | 0.08   | 0.16 | 0.72 |
| m/p-Xylene             | Strong   | 8.22 | 0.03 | 0.09 | 0.20   | 0.41 | 1.79 |
| o-Xylene               | Strong   | 7.16 | 0.01 | 0.03 | 0.08   | 0.14 | 0.65 |
| Acetaldehyde           | Strong   | 2.33 | 0.37 | 0.82 | 1.01   | 1.35 | 3.32 |
| Acrolein               | Strong   | 2.03 | 0.02 | 0.06 | 0.09   | 0.13 | 0.34 |
| Propanal               | Strong   | 2.30 | 0.06 | 0.12 | 0.19   | 0.27 | 0.62 |
| Acetone                | Strong   | 2.33 | 0.68 | 1.26 | 1.81   | 2.52 | 7.03 |
| MTBE                   | Strong   | 5.79 | 0.01 | 0.03 | 0.05   | 0.13 | 0.74 |
| 2-Butanone             | Strong   | 2.02 | 0.00 | 0.04 | 0.06   | 0.08 | 0.16 |
| Butanal                | Strong   | 1.95 | 0.00 | 0.07 | 0.10   | 0.13 | 0.28 |
| Crotonaldehyde         | Strong   | 1.54 | 0.01 | 0.01 | 0.02   | 0.03 | 0.18 |
| Methacrolein           | Weak     | 0.97 | 0.01 | 0.02 | 0.03   | 0.04 | 0.39 |
| 1,1-Dichloroethene     | Weak     | 0.64 | 0.00 | 0.01 | 0.01   | 0.02 | 0.04 |

**Table S3.** The reference exposure level (REL) and cancer potency factor (CPF) of selected VOC species <sup>a</sup>.

| Species                   | CAS       | Chronic REL<br>( $\mu\text{g}/\text{m}^3$ ) | CPF<br>( $\text{mg}/\text{kg}\cdot\text{day}$ ) <sup>-1</sup> |
|---------------------------|-----------|---------------------------------------------|---------------------------------------------------------------|
| Propylene                 | 115-07-1  | 3000                                        |                                                               |
| Vinyl chloride            | 75-01-4   |                                             | 0.27                                                          |
| 1,3-Butadiene             | 106-99-0  | 2                                           | 0.6                                                           |
| Acetaldehyde              | 75-07-0   | 140                                         | 0.01                                                          |
| Bromomethane              | 74-83-9   | 5                                           |                                                               |
| Chloroethane              | 75-00-3   | 3000                                        |                                                               |
| Acrolein                  | 107-02-8  | 0.35                                        |                                                               |
| 1,1-Dichloroethene        | 75-35-4   | 7                                           |                                                               |
| Carbon disulfide          | 75-15-0   | 800                                         |                                                               |
| 2-Propanol                | 67-63-0   | 7000                                        |                                                               |
| Methylene chloride        | 75-09-2   | 400                                         | 0.0035                                                        |
| MTBE                      | 1634-04-4 | 8000                                        | 0.0018                                                        |
| n-Hexane                  | 110-54-3  | 7000                                        |                                                               |
| 1,1-Dichloroethane        | 75-34-3   |                                             | 0.0057                                                        |
| Vinyl acetate             | 108-05-4  | 200                                         |                                                               |
| Trichloromethane          | 67-66-3   | 300                                         | 0.019                                                         |
| 1,1,1-Trichloroethane     | 71-55-6   | 1000                                        |                                                               |
| Carbon tetrachloride      | 56-23-5   | 4                                           | 0.15                                                          |
| Benzene                   | 71-43-2   | 3                                           | 0.1                                                           |
| 1,2-Dichloroethane        | 107-06-2  | 400                                         | 0.072                                                         |
| Trichloroethene           | 79-01-6   | 600                                         | 0.007                                                         |
| 1,4-Dioxane               | 123-91-1  | 300                                         | 0.027                                                         |
| Toluene                   | 108-88-3  | 300                                         |                                                               |
| 1,1,2-Trichloroethane     | 79-00-5   |                                             | 0.057                                                         |
| Tetrachloroethene         | 127-18-4  | 3.5                                         | 0.021                                                         |
| Ethylene dibromide        | 106-93-4  | 8                                           | 0.25                                                          |
| Chlorobenzene             | 108-90-7  | 1000                                        |                                                               |
| Ethylbenzene              | 100-41-4  | 2000                                        | 0.0087                                                        |
| m/p-Xylene                | 108-38-3  | 700                                         |                                                               |
| o-Xylene                  | 95-47-6   | 700                                         |                                                               |
| Styrene                   | 100-42-5  | 900                                         |                                                               |
| 1,1,2,2-Tetrachloroethane | 79-34-5   |                                             | 0.2                                                           |
| 1,4-Dichlorobenzene       | 106-46-7  | 800                                         | 0.04                                                          |
| Benzyl chloride           | 100-44-7  |                                             | 0.17                                                          |
| Naphthalene               | 91-20-3   |                                             | 0.12                                                          |

a. Data were obtained from (CalEPA, 2015)

**Table S4.** The target organ systems affected by non-carcinogenic adverse effects of selected VOC species <sup>a</sup>.

| Species                | Target organ systems |                       |                     |                  |      |                    |               |                |                    |
|------------------------|----------------------|-----------------------|---------------------|------------------|------|--------------------|---------------|----------------|--------------------|
|                        | Alimentary System    | Cardiovascular System | Reproductive System | Endocrine System | Eyes | Hematologic System | Kidney System | Nervous System | Respiratory System |
| Propylene              |                      |                       |                     |                  |      |                    |               |                | X                  |
| 1,3-Butadiene          |                      |                       | X                   |                  |      |                    |               |                |                    |
| Acetaldehyde           |                      |                       |                     |                  |      |                    |               |                | X                  |
| Bromomethane           |                      |                       | X                   |                  |      |                    |               | X              | X                  |
| Chloroethane           | X                    |                       | X                   |                  |      |                    |               |                |                    |
| Acrolein               |                      |                       |                     |                  |      |                    |               |                | X                  |
| 1,1-Dichloroethene     | X                    |                       |                     |                  |      |                    |               |                |                    |
| Carbon disulfide       | X                    |                       | X                   |                  |      |                    |               | X              |                    |
| 2-Propanol             |                      |                       | X                   |                  |      |                    | X             |                |                    |
| Methylene chloride     |                      | X                     |                     |                  |      |                    |               | X              |                    |
| MTBE                   | X                    |                       |                     |                  | X    |                    | X             |                |                    |
| n-Hexane               |                      |                       |                     |                  |      |                    |               | X              |                    |
| Vinyl acetate          |                      |                       |                     |                  |      |                    |               |                | X                  |
| Trichloromethane       | X                    |                       | X                   |                  |      |                    | X             |                |                    |
| 1,1,1 -Trichloroethane |                      |                       |                     |                  |      |                    |               | X              |                    |
| Carbon tetrachloride   | X                    |                       | X                   |                  |      |                    |               | X              |                    |
| Benzene                |                      |                       |                     |                  |      | X                  |               |                |                    |
| 1,2-Dichloroethane     | X                    |                       |                     |                  |      |                    |               |                |                    |
| Trichloroethene        |                      |                       |                     |                  | X    |                    |               | X              |                    |
| 1,4-Dioxane            | X                    | X                     |                     |                  |      |                    | X             |                |                    |
| Toluene                |                      |                       | X                   |                  |      |                    |               | X              | X                  |
| Tetrachloroethene      | X                    |                       |                     |                  |      |                    | X             |                |                    |
| Ethylene dibromide     |                      |                       | X                   |                  |      |                    |               |                |                    |
| Chlorobenzene          | X                    |                       | X                   |                  |      |                    | X             |                |                    |
| Ethylbenzene           | X                    |                       | X                   | X                |      |                    | X             |                |                    |
| m/p-Xylene             |                      |                       |                     |                  | X    |                    |               | X              | X                  |
| o-Xylene               |                      |                       |                     |                  | X    |                    |               | X              | X                  |
| Styrene                |                      |                       |                     |                  |      |                    |               | X              |                    |
| 1,4-Dichlorobenzene    | X                    |                       |                     |                  |      |                    | X             | X              | X                  |

a. Data were obtained from (CalEPA, 2015)

**Table S5.** Exposure parameters for calculating residential inhalation cancer risk for each age group <sup>a</sup>.

| Parameter   | Unit     | Age (years)               |      |      |       |
|-------------|----------|---------------------------|------|------|-------|
|             |          | 3 <sup>rd</sup> Trimester | 0–2  | 2–16 | 16–70 |
| BR/BW(mean) | L/kg-day | 225                       | 658  | 452  | 185   |
| A           | unitless | 1                         | 1    | 1    | 1     |
| EF          | unitless | 0.96                      | 0.96 | 0.96 | 0.96  |
| ASF         | unitless | 10                        | 10   | 3    | 1     |
| ED          | year     | 0.25                      | 2    | 14   | 54    |
| AT          | year     | 70                        | 70   | 70   | 70    |
| FAH         | unitless | 0.85                      | 0.85 | 0.72 | 0.73  |

a. Data were obtained from (CalEPA, 2015)



**Table S6.** Statistics of VOCs species during P1 and P2.

| Species   | Compounds              | Mean<br>(ppbv) |      | Min<br>(ppbv) |      | Median<br>(ppbv) |      | Max<br>(ppbv) |       | SD <sup>a</sup><br>(ppbv) |      | Ratio of BDL <sup>b</sup> (%) |       |
|-----------|------------------------|----------------|------|---------------|------|------------------|------|---------------|-------|---------------------------|------|-------------------------------|-------|
|           |                        | P1             | P2   | P1            | P2   | P1               | P2   | P1            | P2    | P1                        | P2   | P1                            | P2    |
| Acetylene |                        | 0.86           | 0.90 | 0.10          | 0.19 | 0.62             | 0.79 | 4.21          | 2.44  | 0.85                      | 0.57 | 0.00                          | 0.00  |
| Alkenes   |                        | 1.46           | 1.36 | 0.23          | 0.30 | 1.04             | 1.07 | 5.67          | 4.40  | 1.23                      | 0.95 |                               |       |
|           | Ethylene               | 0.93           | 0.84 | 0.10          | 0.15 | 0.56             | 0.58 | 4.26          | 3.16  | 0.95                      | 0.70 | 0.00                          | 0.00  |
|           | Propylene              | 0.31           | 0.30 | 0.05          | 0.07 | 0.26             | 0.27 | 1.19          | 0.78  | 0.24                      | 0.18 | 0.00                          | 0.00  |
|           | 1-Butene               | 0.09           | 0.09 | 0.02          | 0.02 | 0.07             | 0.07 | 0.27          | 0.31  | 0.06                      | 0.06 | 1.35                          | 1.05  |
|           | 1,3-Butadiene          | 0.01           | 0.02 | 0.00          | 0.00 | 0.01             | 0.01 | 0.03          | 0.06  | 0.01                      | 0.01 | 62.16                         | 49.47 |
|           | trans-2-Butene         | 0.02           | 0.04 | 0.00          | 0.00 | 0.01             | 0.01 | 0.15          | 0.24  | 0.03                      | 0.05 | 67.57                         | 57.89 |
|           | cis-2-Butene           | 0.01           | 0.01 | 0.00          | 0.00 | 0.01             | 0.01 | 0.03          | 0.03  | 0.00                      | 0.01 | 91.89                         | 90.53 |
|           | 1-Pentene              | 0.02           | 0.01 | 0.01          | 0.00 | 0.01             | 0.01 | 0.06          | 0.04  | 0.01                      | 0.01 | 72.97                         | 82.11 |
|           | trans-2-Pentene        | 0.01           | 0.01 | 0.00          | 0.00 | 0.01             | 0.01 | 0.04          | 0.05  | 0.01                      | 0.01 | 89.19                         | 86.32 |
|           | cis-2-Pentene          | 0.01           | 0.01 | 0.00          | 0.00 | 0.01             | 0.01 | 0.06          | 0.03  | 0.01                      | 0.01 | 94.59                         | 89.47 |
|           | Isoprene               | 0.04           | 0.03 | 0.01          | 0.00 | 0.03             | 0.03 | 0.32          | 0.08  | 0.04                      | 0.02 | 8.11                          | 22.11 |
|           | 1-Hexene               | 0.01           | 0.01 | 0.00          | 0.00 | 0.01             | 0.01 | 0.06          | 0.05  | 0.01                      | 0.01 | 59.46                         | 52.63 |
| Alkanes   |                        | 6.84           | 5.66 | 1.14          | 1.63 | 5.49             | 4.73 | 24.29         | 14.74 | 5.23                      | 3.30 |                               |       |
|           | Ethane                 | 1.91           | 1.80 | 0.31          | 0.47 | 1.53             | 1.61 | 7.19          | 4.67  | 1.50                      | 1.06 | 0.00                          | 0.00  |
|           | Propane                | 1.87           | 1.63 | 0.35          | 0.52 | 1.56             | 1.45 | 5.82          | 3.94  | 1.27                      | 0.87 | 0.00                          | 0.00  |
|           | Isobutane              | 0.47           | 0.37 | 0.04          | 0.06 | 0.33             | 0.25 | 1.91          | 1.13  | 0.43                      | 0.28 | 0.00                          | 0.00  |
|           | n-Butane               | 0.67           | 0.53 | 0.06          | 0.14 | 0.50             | 0.39 | 2.50          | 1.43  | 0.58                      | 0.38 | 0.00                          | 0.00  |
|           | Isopentane             | 0.30           | 0.17 | 0.03          | 0.04 | 0.17             | 0.13 | 1.42          | 0.58  | 0.33                      | 0.12 | 0.00                          | 0.00  |
|           | n-Pentane              | 0.41           | 0.28 | 0.04          | 0.06 | 0.23             | 0.15 | 2.04          | 0.98  | 0.46                      | 0.25 | 0.00                          | 0.00  |
|           | 2,2-Dimethylbutane     | 0.01           | 0.01 | 0.00          | 0.01 | 0.01             | 0.01 | 0.04          | 0.04  | 0.01                      | 0.01 | 37.84                         | 23.16 |
|           | 2,3-Dimethylbutane     | 0.07           | 0.05 | 0.00          | 0.01 | 0.02             | 0.03 | 0.61          | 0.29  | 0.13                      | 0.06 | 17.57                         | 11.58 |
|           | 2-Methylpentane        | 0.15           | 0.10 | 0.00          | 0.01 | 0.11             | 0.08 | 0.59          | 0.47  | 0.14                      | 0.09 | 5.41                          | 6.32  |
|           | Cyclopentane           | 0.04           | 0.02 | 0.00          | 0.00 | 0.02             | 0.01 | 0.94          | 0.14  | 0.11                      | 0.02 | 48.65                         | 60.00 |
|           | 3-Methylpentane        | 0.09           | 0.06 | 0.00          | 0.01 | 0.07             | 0.05 | 0.38          | 0.39  | 0.08                      | 0.06 | 6.76                          | 0.00  |
|           | n-Hexane               | 0.11           | 0.07 | 0.01          | 0.01 | 0.06             | 0.05 | 0.86          | 0.33  | 0.14                      | 0.06 | 0.00                          | 0.00  |
|           | 2,4-Dimethylpentane    | 0.02           | 0.02 | 0.01          | 0.01 | 0.02             | 0.01 | 0.08          | 0.35  | 0.02                      | 0.04 | 36.49                         | 50.53 |
|           | Methylcyclopentane     | 0.07           | 0.08 | 0.00          | 0.00 | 0.05             | 0.04 | 0.44          | 1.71  | 0.08                      | 0.18 | 9.46                          | 4.26  |
|           | 2-Methylhexane         | 0.05           | 0.04 | 0.00          | 0.01 | 0.04             | 0.03 | 0.48          | 0.67  | 0.06                      | 0.07 | 14.86                         | 20.00 |
|           | Cyclohexane            | 0.09           | 0.11 | 0.01          | 0.01 | 0.07             | 0.11 | 0.26          | 0.38  | 0.06                      | 0.06 | 0.00                          | 0.00  |
|           | 2,3-Dimethylpentane    | 0.02           | 0.01 | 0.00          | 0.00 | 0.01             | 0.01 | 0.10          | 0.11  | 0.02                      | 0.02 | 56.76                         | 78.95 |
|           | 3-Methylhexane         | 0.04           | 0.03 | 0.01          | 0.00 | 0.03             | 0.02 | 0.18          | 0.15  | 0.04                      | 0.02 | 10.81                         | 15.79 |
|           | 2,2,4-Trimethylpentane | 0.02           | 0.01 | 0.00          | 0.00 | 0.02             | 0.01 | 0.10          | 0.08  | 0.02                      | 0.01 | 41.89                         | 53.68 |
|           | n-Heptane              | 0.10           | 0.07 | 0.01          | 0.01 | 0.07             | 0.05 | 0.38          | 0.22  | 0.09                      | 0.05 | 0.00                          | 1.05  |
|           | Methylcyclohexane      | 0.05           | 0.03 | 0.00          | 0.00 | 0.03             | 0.02 | 0.21          | 0.13  | 0.05                      | 0.02 | 21.62                         | 32.63 |
|           | 2,3,4-Trimethylpentane | 0.01           | 0.01 | 0.00          | 0.00 | 0.01             | 0.01 | 0.05          | 0.04  | 0.01                      | 0.01 | 70.27                         | 83.16 |

|                  |                           |      |      |      |      |      |      |      |      |      |      |        |       |
|------------------|---------------------------|------|------|------|------|------|------|------|------|------|------|--------|-------|
| Halohydrocarbons | 2-Methylheptane           | 0.02 | 0.01 | 0.00 | 0.00 | 0.01 | 0.01 | 0.07 | 0.05 | 0.01 | 0.01 | 66.22  | 83.16 |
|                  | 3-Methylheptane           | 0.02 | 0.01 | 0.00 | 0.00 | 0.01 | 0.01 | 0.05 | 0.05 | 0.01 | 0.01 | 20.27  | 49.47 |
|                  | n-Octane                  | 0.06 | 0.05 | 0.01 | 0.00 | 0.05 | 0.03 | 0.38 | 0.57 | 0.06 | 0.06 | 5.41   | 10.53 |
|                  | n-Nonane                  | 0.03 | 0.03 | 0.01 | 0.01 | 0.03 | 0.03 | 0.10 | 0.17 | 0.02 | 0.02 | 1.35   | 5.26  |
|                  | n-Decane                  | 0.03 | 0.02 | 0.00 | 0.01 | 0.03 | 0.02 | 0.16 | 0.07 | 0.02 | 0.01 | 12.16  | 40.00 |
|                  | n-Undecane                | 0.03 | 0.02 | 0.00 | 0.01 | 0.02 | 0.02 | 0.07 | 0.07 | 0.02 | 0.01 | 2.70   | 11.58 |
|                  | n-Dodecane                | 0.03 | 0.03 | 0.01 | 0.01 | 0.03 | 0.02 | 0.09 | 0.10 | 0.02 | 0.02 | 0.00   | 5.26  |
|                  | Freon-11                  | 2.65 | 2.31 | 1.08 | 1.24 | 2.39 | 2.25 | 7.29 | 4.91 | 1.47 | 0.76 |        |       |
|                  | Freon-12                  | 0.24 | 0.25 | 0.14 | 0.17 | 0.22 | 0.25 | 0.50 | 0.34 | 0.08 | 0.04 | 0.00   | 0.00  |
|                  | Freon-113                 | 0.38 | 0.46 | 0.21 | 0.41 | 0.38 | 0.46 | 0.47 | 0.67 | 0.04 | 0.04 | 0.00   | 0.00  |
|                  | Freon-114                 | 0.25 | 0.18 | 0.03 | 0.03 | 0.16 | 0.09 | 1.13 | 1.07 | 0.24 | 0.20 | 0.00   | 0.00  |
|                  | Chloromethane             | 0.03 | 0.02 | 0.01 | 0.00 | 0.02 | 0.02 | 0.40 | 0.04 | 0.05 | 0.01 | 60.81  | 44.21 |
|                  | Vinyl chloride            | 0.28 | 0.28 | 0.13 | 0.01 | 0.24 | 0.25 | 0.74 | 0.64 | 0.13 | 0.13 | 0.00   | 1.05  |
|                  | Bromomethane              | 0.04 | 0.03 | 0.00 | 0.00 | 0.01 | 0.02 | 0.27 | 0.16 | 0.07 | 0.03 | 60.81  | 45.26 |
|                  | Chloroethane              | 0.01 | 0.01 | 0.00 | 0.00 | 0.01 | 0.01 | 0.03 | 0.04 | 0.01 | 0.01 | 48.65  | 35.79 |
|                  | Methylene chloride        | 0.02 | 0.02 | 0.00 | 0.00 | 0.01 | 0.01 | 0.20 | 0.07 | 0.04 | 0.02 | 71.62  | 67.37 |
|                  | Trichloromethane          | 0.44 | 0.28 | 0.05 | 0.03 | 0.30 | 0.25 | 2.55 | 1.42 | 0.47 | 0.22 | 0.00   | 0.00  |
|                  | Carbon tetrachloride      | 0.13 | 0.09 | 0.02 | 0.01 | 0.08 | 0.06 | 0.69 | 0.34 | 0.14 | 0.07 | 0.00   | 0.00  |
|                  | 1,1-Dichloroethene        | 0.08 | 0.09 | 0.06 | 0.05 | 0.08 | 0.09 | 0.13 | 0.17 | 0.02 | 0.02 | 0.00   | 0.00  |
|                  | 1,1-Dichloroethane        | 0.00 | 0.01 | 0.00 | 0.00 | 0.00 | 0.00 | 0.01 | 0.03 | 0.00 | 0.00 | 100.00 | 98.95 |
|                  | trans-1,2-Dichloroethene  | 0.03 | 0.02 | 0.00 | 0.00 | 0.02 | 0.01 | 0.10 | 0.08 | 0.03 | 0.01 | 21.62  | 29.47 |
|                  | cis-1,2-Dichloroethylene  | 0.00 | 0.00 | 0.00 | 0.00 | 0.00 | 0.00 | 0.02 | 0.03 | 0.00 | 0.00 | 89.19  | 94.74 |
|                  | Trichloroethene           | 0.01 | 0.01 | 0.00 | 0.00 | 0.01 | 0.01 | 0.04 | 0.03 | 0.01 | 0.01 | 72.97  | 78.95 |
|                  | Tetrachloroethene         | 0.02 | 0.01 | 0.00 | 0.00 | 0.01 | 0.01 | 0.10 | 0.04 | 0.02 | 0.01 | 59.46  | 57.89 |
|                  | 1,1,1-Trichloroethane     | 0.03 | 0.02 | 0.00 | 0.00 | 0.02 | 0.02 | 0.11 | 0.14 | 0.03 | 0.02 | 27.03  | 38.95 |
|                  | 1,2-Dichloroethane        | 0.00 | 0.01 | 0.00 | 0.00 | 0.00 | 0.00 | 0.04 | 0.33 | 0.01 | 0.04 | 98.65  | 95.79 |
|                  | 1,2-Dichloropropane       | 0.25 | 0.19 | 0.02 | 0.02 | 0.12 | 0.12 | 1.16 | 0.73 | 0.29 | 0.16 | 0.00   | 0.00  |
|                  | Dibromochloromethane      | 0.13 | 0.07 | 0.00 | 0.00 | 0.06 | 0.03 | 0.68 | 0.24 | 0.17 | 0.08 | 27.03  | 45.26 |
|                  | Bromodichloromethane      | 0.00 | 0.01 | 0.00 | 0.00 | 0.00 | 0.01 | 0.01 | 0.03 | 0.00 | 0.01 | 100.00 | 94.74 |
|                  | trans-1,3-Dichloropropene | 0.00 | 0.00 | 0.00 | 0.00 | 0.00 | 0.00 | 0.02 | 0.03 | 0.00 | 0.00 | 93.24  | 95.79 |
|                  | cis-1,3-Dichloropropene   | 0.00 | 0.01 | 0.00 | 0.00 | 0.00 | 0.00 | 0.03 | 0.04 | 0.00 | 0.01 | 98.65  | 90.53 |
|                  | 1,1,2-Trichloroethane     | 0.01 | 0.01 | 0.00 | 0.00 | 0.01 | 0.01 | 0.04 | 0.03 | 0.01 | 0.00 | 95.95  | 98.95 |
|                  | Ethylene dibromide        | 0.04 | 0.02 | 0.02 | 0.01 | 0.03 | 0.02 | 0.09 | 0.05 | 0.01 | 0.01 | 0.00   | 0.00  |
|                  | Chlorobenzene             | 0.00 | 0.01 | 0.00 | 0.00 | 0.00 | 0.00 | 0.02 | 0.03 | 0.00 | 0.00 | 83.78  | 74.74 |
|                  | Bromofomi                 | 0.02 | 0.02 | 0.00 | 0.00 | 0.01 | 0.01 | 0.19 | 0.04 | 0.03 | 0.01 | 43.24  | 40.00 |
|                  | 1,1,2,2-Tetrachloroethane | 0.00 | 0.01 | 0.00 | 0.00 | 0.00 | 0.00 | 0.02 | 0.03 | 0.00 | 0.00 | 94.59  | 87.37 |
|                  | 1,3-Dichlorobenzene       | 0.01 | 0.01 | 0.00 | 0.00 | 0.01 | 0.01 | 0.17 | 0.05 | 0.02 | 0.01 | 55.41  | 43.16 |
|                  | 1,4-Dichlorobenzene       | 0.03 | 0.04 | 0.01 | 0.01 | 0.03 | 0.03 | 0.13 | 0.16 | 0.02 | 0.02 | 17.57  | 2.11  |
|                  | Benzyl chloride           | 0.03 | 0.04 | 0.01 | 0.01 | 0.03 | 0.03 | 0.15 | 0.13 | 0.02 | 0.02 | 12.16  | 0.00  |
|                  | 1,2-Dichlorobenzene       | 0.01 | 0.01 | 0.00 | 0.00 | 0.01 | 0.01 | 0.03 | 0.03 | 0.00 | 0.00 | 93.24  | 83.16 |
|                  | 1,2,4-Trichlorobenzene    | 0.01 | 0.01 | 0.01 | 0.00 | 0.01 | 0.01 | 0.03 | 0.05 | 0.00 | 0.01 | 87.84  | 77.89 |
|                  | Hexachloro-1,3-butadiene  | 0.03 | 0.03 | 0.01 | 0.01 | 0.02 | 0.02 | 0.40 | 0.08 | 0.05 | 0.02 | 18.92  | 15.79 |
|                  |                           | 0.01 | 0.02 | 0.01 | 0.01 | 0.01 | 0.01 | 0.02 | 0.07 | 0.00 | 0.01 | 1.35   | 1.05  |

|           |                        |      |      |      |      |      |      |       |       |      |      |       |       |
|-----------|------------------------|------|------|------|------|------|------|-------|-------|------|------|-------|-------|
| Aromatics | Carbon disulfide       | 0.05 | 0.04 | 0.01 | 0.01 | 0.02 | 0.02 | 0.28  | 0.18  | 0.07 | 0.04 | 17.57 | 12.63 |
|           |                        | 2.05 | 1.43 | 0.34 | 0.29 | 1.43 | 1.20 | 7.68  | 4.91  | 1.77 | 0.96 |       |       |
|           | Benzene                | 0.44 | 0.43 | 0.08 | 0.09 | 0.29 | 0.28 | 1.78  | 1.57  | 0.42 | 0.35 | 0.00  | 0.00  |
|           | Toluene                | 0.57 | 0.34 | 0.05 | 0.05 | 0.34 | 0.26 | 2.33  | 1.53  | 0.55 | 0.28 | 0.00  | 0.00  |
|           | Ethylbenzene           | 0.16 | 0.09 | 0.02 | 0.01 | 0.10 | 0.06 | 0.72  | 0.28  | 0.17 | 0.07 | 0.00  | 0.00  |
|           | m/p-Xylene             | 0.41 | 0.23 | 0.04 | 0.03 | 0.24 | 0.14 | 1.79  | 0.75  | 0.42 | 0.20 | 0.00  | 0.00  |
|           | o-Xylene               | 0.15 | 0.09 | 0.01 | 0.01 | 0.09 | 0.06 | 0.65  | 0.25  | 0.15 | 0.07 | 0.00  | 0.00  |
|           | Styrene                | 0.04 | 0.03 | 0.01 | 0.01 | 0.03 | 0.02 | 0.11  | 0.06  | 0.02 | 0.01 | 0.00  | 6.32  |
|           | Isopropylbenzene       | 0.01 | 0.02 | 0.00 | 0.00 | 0.01 | 0.02 | 0.05  | 0.04  | 0.01 | 0.01 | 59.46 | 30.53 |
|           | n-Propylbenzene        | 0.02 | 0.01 | 0.00 | 0.00 | 0.02 | 0.01 | 0.05  | 0.05  | 0.01 | 0.01 | 40.54 | 42.11 |
|           | p-Ethyltoluene         | 0.03 | 0.02 | 0.00 | 0.00 | 0.03 | 0.02 | 0.08  | 0.13  | 0.02 | 0.02 | 18.92 | 33.68 |
|           | m-Ethyltoluene         | 0.02 | 0.02 | 0.00 | 0.00 | 0.02 | 0.02 | 0.06  | 0.07  | 0.01 | 0.01 | 25.68 | 30.53 |
|           | 1,3,5-Trimethylbenzene | 0.02 | 0.02 | 0.01 | 0.00 | 0.01 | 0.01 | 0.07  | 0.05  | 0.02 | 0.01 | 13.51 | 23.16 |
|           | o-Ethyltoluene         | 0.02 | 0.02 | 0.00 | 0.00 | 0.01 | 0.02 | 0.08  | 0.06  | 0.01 | 0.01 | 36.49 | 25.26 |
|           | 1,2,4-Trimethylbenzene | 0.04 | 0.03 | 0.01 | 0.01 | 0.03 | 0.02 | 0.14  | 0.10  | 0.03 | 0.02 | 0.00  | 9.47  |
|           | 1,2,3-Trimethylbenzene | 0.01 | 0.01 | 0.00 | 0.00 | 0.01 | 0.01 | 0.04  | 0.06  | 0.01 | 0.01 | 24.32 | 43.16 |
|           | m-Diethylbenzene       | 0.01 | 0.01 | 0.00 | 0.00 | 0.01 | 0.01 | 0.02  | 0.04  | 0.01 | 0.01 | 82.43 | 78.95 |
|           | p-Diethylbenzene       | 0.01 | 0.01 | 0.00 | 0.00 | 0.01 | 0.01 | 0.05  | 0.05  | 0.01 | 0.01 | 72.97 | 80.00 |
| OVOCs     | Naphthalene            | 0.08 | 0.06 | 0.01 | 0.01 | 0.07 | 0.05 | 0.21  | 0.15  | 0.03 | 0.03 | 1.35  | 1.05  |
|           |                        | 5.52 | 4.56 | 2.85 | 1.79 | 5.08 | 3.99 | 12.59 | 10.36 | 2.20 | 1.94 |       |       |
|           | Acetaldehyde           | 1.03 | 1.16 | 0.37 | 0.45 | 0.98 | 1.06 | 2.36  | 3.32  | 0.41 | 0.46 | 0.00  | 0.00  |
|           | Acrolein               | 0.11 | 0.09 | 0.03 | 0.02 | 0.09 | 0.08 | 0.34  | 0.25  | 0.07 | 0.05 | 0.00  | 1.05  |
|           | Propanal               | 0.25 | 0.19 | 0.10 | 0.06 | 0.21 | 0.15 | 0.62  | 0.41  | 0.13 | 0.10 | 0.00  | 0.00  |
|           | Acetone                | 2.16 | 1.89 | 1.19 | 0.68 | 2.01 | 1.46 | 4.22  | 7.03  | 0.75 | 1.08 | 0.00  | 0.00  |
|           | 2-Propanol             | 0.33 | 0.20 | 0.08 | 0.04 | 0.24 | 0.15 | 0.92  | 0.85  | 0.21 | 0.15 | 0.00  | 0.00  |
|           | MTBE                   | 0.10 | 0.08 | 0.01 | 0.01 | 0.07 | 0.05 | 0.46  | 0.74  | 0.09 | 0.11 | 6.76  | 6.32  |
|           | Methacrolein           | 0.05 | 0.03 | 0.01 | 0.01 | 0.03 | 0.03 | 0.39  | 0.06  | 0.06 | 0.01 | 37.84 | 45.26 |
|           | Vinyl acetate          | 0.01 | 0.01 | 0.00 | 0.00 | 0.01 | 0.01 | 0.04  | 0.04  | 0.01 | 0.01 | 74.32 | 84.21 |
|           | 2-Butanone             | 0.07 | 0.06 | 0.00 | 0.01 | 0.07 | 0.05 | 0.16  | 0.16  | 0.03 | 0.03 | 4.05  | 3.16  |
|           | Butanal                | 0.13 | 0.09 | 0.00 | 0.01 | 0.12 | 0.09 | 0.27  | 0.28  | 0.05 | 0.04 | 2.70  | 5.26  |
|           | Ethyl acetate          | 0.47 | 0.21 | 0.02 | 0.01 | 0.26 | 0.15 | 2.50  | 0.79  | 0.56 | 0.19 | 0.00  | 6.32  |
|           | Tetrahydrofuran        | 0.04 | 0.02 | 0.01 | 0.01 | 0.03 | 0.02 | 0.76  | 0.09  | 0.09 | 0.02 | 44.59 | 66.32 |
|           | 4-Methyl-2-pentanone   | 0.05 | 0.04 | 0.01 | 0.01 | 0.04 | 0.03 | 0.19  | 0.11  | 0.04 | 0.02 | 8.11  | 9.47  |
|           | Crotonaldehyde         | 0.03 | 0.02 | 0.01 | 0.01 | 0.03 | 0.02 | 0.18  | 0.10  | 0.03 | 0.01 | 8.11  | 14.74 |
|           | Pentanal               | 0.11 | 0.10 | 0.05 | 0.01 | 0.10 | 0.08 | 0.32  | 0.32  | 0.05 | 0.06 | 0.00  | 2.11  |
|           | Methyl methacrylate    | 0.01 | 0.01 | 0.00 | 0.00 | 0.01 | 0.01 | 0.08  | 0.06  | 0.01 | 0.01 | 17.57 | 34.74 |
|           | 1,4-Dioxane            | 0.01 | 0.01 | 0.00 | 0.00 | 0.01 | 0.01 | 0.09  | 0.07  | 0.01 | 0.01 | 51.35 | 48.42 |
|           | 2-Hexanone             | 0.02 | 0.02 | 0.00 | 0.00 | 0.02 | 0.01 | 0.13  | 0.11  | 0.02 | 0.02 | 25.68 | 44.21 |
|           | Hexanal                | 0.41 | 0.26 | 0.07 | 0.07 | 0.36 | 0.24 | 1.18  | 0.74  | 0.25 | 0.16 | 0.00  | 0.00  |
|           | Benzaldehyde           | 0.06 | 0.04 | 0.02 | 0.01 | 0.05 | 0.04 | 0.22  | 0.13  | 0.04 | 0.02 | 6.76  | 26.32 |
|           | m-Tolualdehyde         | 0.06 | 0.04 | 0.01 | 0.01 | 0.05 | 0.04 | 0.36  | 0.23  | 0.06 | 0.03 | 1.35  | 0.00  |

a. SD: standard deviation. b. BDL: below detection limit.

**Table S7.** Substance-specific chronic inhalation hazard quotients (HQs) and the hazard index (HI) by target organ system during P1 and P2.

| Speiceis               | Alimentary System |          | Cardiovascular Svstem |          | Reproductive Svstem |          | Endocrine Svstem |          | Eyes     |          | Hematologic Svstem |          | Kidney Svstem |          | Nervous Svstem |          | Respiratory Svstem |          |
|------------------------|-------------------|----------|-----------------------|----------|---------------------|----------|------------------|----------|----------|----------|--------------------|----------|---------------|----------|----------------|----------|--------------------|----------|
|                        | P1                | P2       | P1                    | P2       | P1                  | P2       | P1               | P2       | P1       | P2       | P1                 | P2       | P1            | P2       | P1             | P2       | P1                 | P2       |
| Propylene              |                   |          |                       |          |                     |          |                  |          |          |          |                    |          |               |          |                |          | 1.91E-04           | 1.82E-04 |
| 1,3-Butadiene          |                   |          |                       |          | 1.51E-02            | 1.97E-02 |                  |          |          |          |                    |          |               |          |                |          |                    |          |
| Acetaldehyde           |                   |          |                       |          |                     |          |                  |          |          |          |                    |          |               |          |                |          | 1.27E-02           | 1.58E-02 |
| Bromomethane           |                   |          |                       |          | 1.10E-02            | 1.12E-02 |                  |          |          |          |                    |          |               |          | 1.10E-02       | 1.12E-02 | 1.10E-02           | 1.12E-02 |
| Chloroethane           | 2.15E-06          | 1.64E-06 |                       |          | 2.15E-06            | 1.64E-06 |                  |          |          |          |                    |          |               |          |                |          |                    |          |
| Acrolein               |                   |          |                       |          |                     |          |                  |          |          |          |                    |          |               |          |                |          | 7.93E-01           | 6.15E-01 |
| 1,1-Dichlorethene      | 2.15E-03          | 3.02E-03 |                       |          |                     |          |                  |          |          |          |                    |          |               |          |                |          |                    |          |
| Carbon disulfide       | 2.41E-04          | 1.64E-04 |                       |          | 2.41E-04            | 1.64E-04 |                  |          |          |          |                    |          |               |          | 2.41E-04       | 1.64E-04 |                    |          |
| 2-Propanol             |                   |          |                       |          | 1.21E-04            | 7.32E-05 |                  |          |          |          |                    |          | 1.21E-04      | 7.32E-05 |                |          |                    |          |
| Methylene chloride     |                   |          | 4.26E-03              | 2.51E-03 |                     |          |                  |          |          |          |                    |          |               |          | 4.26E-03       | 2.51E-03 |                    |          |
| MTBE                   | 4.64E-05          | 4.06E-05 |                       |          |                     |          |                  |          | 4.64E-05 | 4.06E-05 |                    |          | 4.64E-05      | 4.06E-05 |                |          |                    |          |
| n-Hexane               |                   |          |                       |          |                     |          |                  |          |          |          |                    |          |               |          | 5.81E-05       | 3.46E-05 |                    |          |
| Vinyl acetate          |                   |          |                       |          |                     |          |                  |          |          |          |                    |          |               |          |                |          | 1.40E-04           | 1.21E-04 |
| Trichloromethane       | 2.55E-03          | 1.46E-03 |                       |          | 2.55E-03            | 1.46E-03 |                  |          |          |          |                    |          | 2.55E-03      | 1.46E-03 |                |          |                    |          |
| 1,1,1 -Trichloroethane |                   |          |                       |          |                     |          |                  |          |          |          |                    |          |               |          | 2.18E-05       | 4.08E-05 |                    |          |
| Carbon tetrachloride   | 1.32E-01          | 1.46E-01 |                       |          | 1.32E-01            | 1.46E-01 |                  |          |          |          |                    |          |               |          | 1.32E-01       | 1.46E-01 |                    |          |
| Benzene                |                   |          |                       |          |                     |          |                  |          |          |          | 5.45E-01           | 5.09E-01 |               |          |                |          |                    |          |
| 1,2-Dichloroethane     | 2.63E-03          | 2.00E-03 |                       |          |                     |          |                  |          |          |          |                    |          |               |          |                |          |                    |          |
| Trichloroethene        |                   |          |                       |          |                     |          |                  |          | 1.35E-04 | 1.06E-04 |                    |          |               |          | 1.35E-04       | 1.06E-04 |                    |          |
| 1,4-Dioxane            | 1.15E-04          | 1.09E-04 | 1.15E-04              | 1.09E-04 |                     |          |                  |          |          |          |                    |          | 1.15E-04      | 1.09E-04 |                |          |                    |          |
| Toluene                |                   |          |                       |          | 6.97E-03            | 4.46E-03 |                  |          |          |          |                    |          |               |          | 6.97E-03       | 4.46E-03 | 6.97E-03           | 4.46E-03 |
| Tetrachloroethene      | 5.97E-02          | 4.24E-02 |                       |          |                     |          |                  |          |          |          |                    |          | 5.97E-02      | 4.24E-02 |                |          |                    |          |
| Ethylene dibromide     |                   |          |                       |          | 4.15E-03            | 5.12E-03 |                  |          |          |          |                    |          |               |          |                |          |                    |          |
| Chlorobenzene          | 1.09E-04          | 7.66E-05 |                       |          | 1.09E-04            | 7.66E-05 |                  |          |          |          |                    |          | 1.09E-04      | 7.66E-05 |                |          |                    |          |
| Ethylbenzene           | 3.32E-04          | 2.35E-04 |                       |          | 3.32E-04            | 2.35E-04 | 3.32E-04         | 2.35E-04 |          |          |                    |          | 3.32E-04      | 2.35E-04 |                |          |                    |          |
| m/p-Xylene             |                   |          |                       |          |                     |          |                  |          | 2.49E-03 | 1.63E-03 |                    |          |               |          | 2.49E-03       | 1.63E-03 | 2.49E-03           | 1.63E-03 |
| o-Xylene               |                   |          |                       |          |                     |          |                  |          | 2.49E-03 | 1.63E-03 |                    |          |               |          | 2.49E-03       | 1.63E-03 | 2.49E-03           | 1.63E-03 |
| Styrene                |                   |          |                       |          |                     |          |                  |          |          |          |                    |          |               |          | 1.81E-04       | 1.38E-04 |                    |          |
| 1,4-Dichlorobenzene    | 2.69E-04          | 2.95E-04 |                       |          |                     |          |                  |          |          |          |                    |          | 2.69E-04      | 2.95E-04 | 2.69E-04       | 2.95E-04 | 2.69E-04           | 2.95E-04 |
| HI                     | 2.00E-01          | 1.97E-01 | 4.38E-03              | 2.62E-03 | 1.73E-01            | 1.89E-01 | 3.32E-04         | 2.35E-04 | 5.16E-03 | 3.41E-03 | 5.27E-01           | 5.08E-01 | 6.32E-02      | 4.47E-02 | 1.60E-01       | 1.69E-01 | 8.34E-01           | 6.51E-01 |

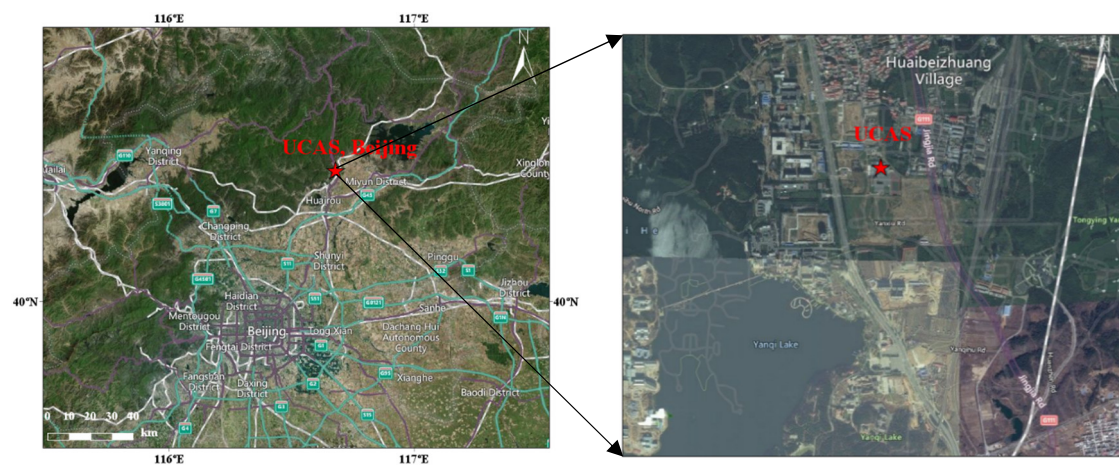

**Figure S1.** Location of the sampling site in UCAS, Beijing.

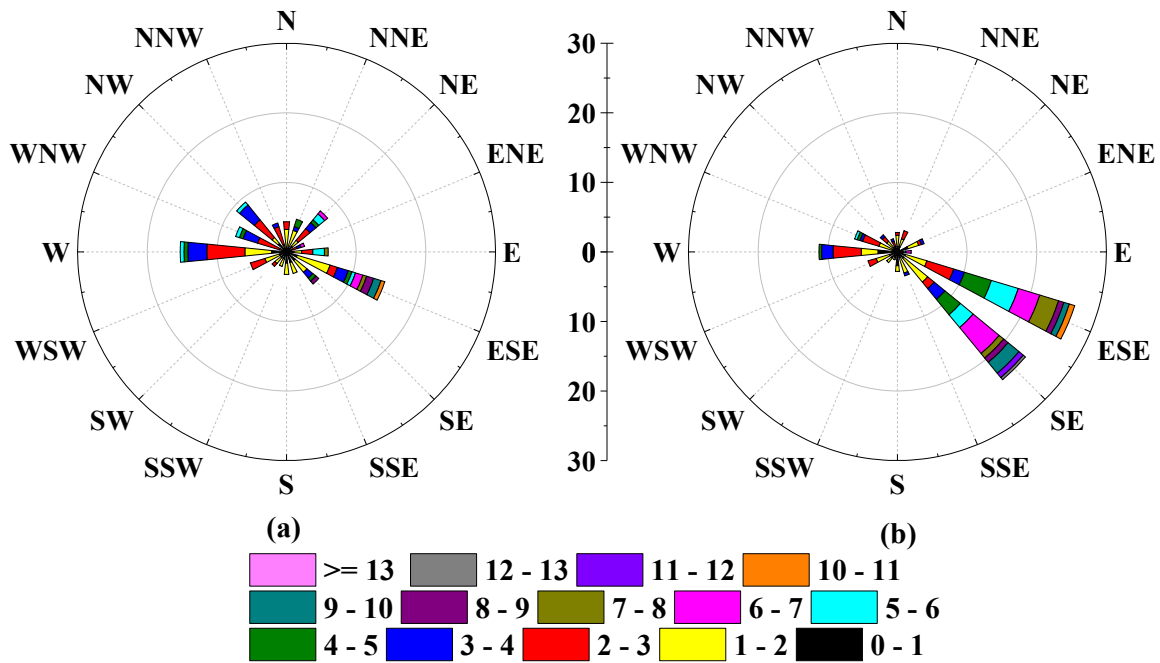

**Figure S2.** Wind rose diagrams during (a) P1 and (b) P2.

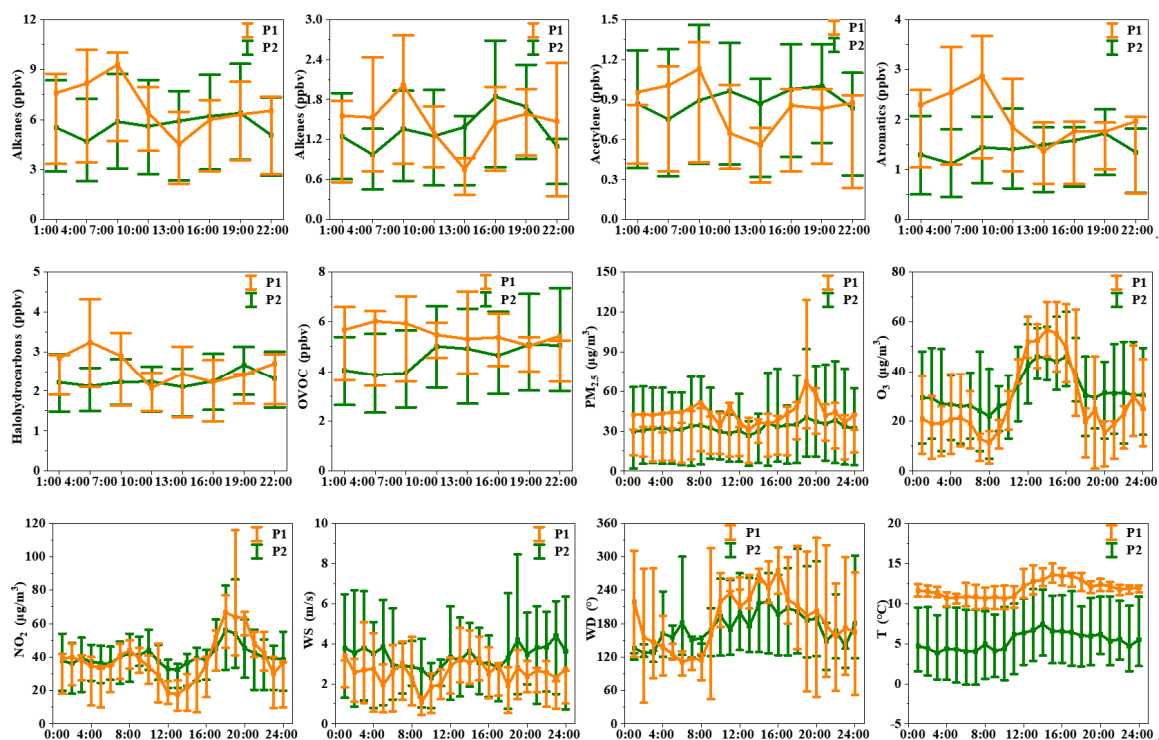

**Figure S3.** Diurnal variations of VOC groups, PM<sub>2.5</sub>, NO<sub>2</sub>, O<sub>3</sub> and meteorological parameters (T, WD and WS) during P1 and P2.

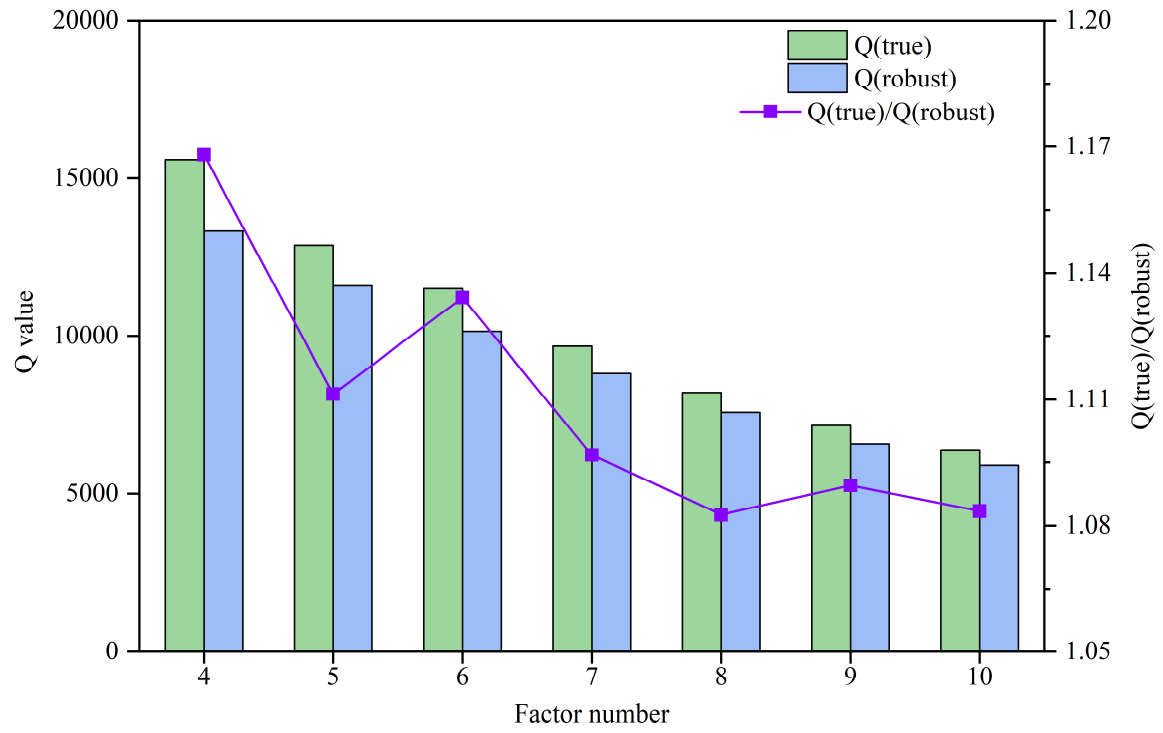

**Figure S4.** Variation of Q Value with Factor in PMF Model.



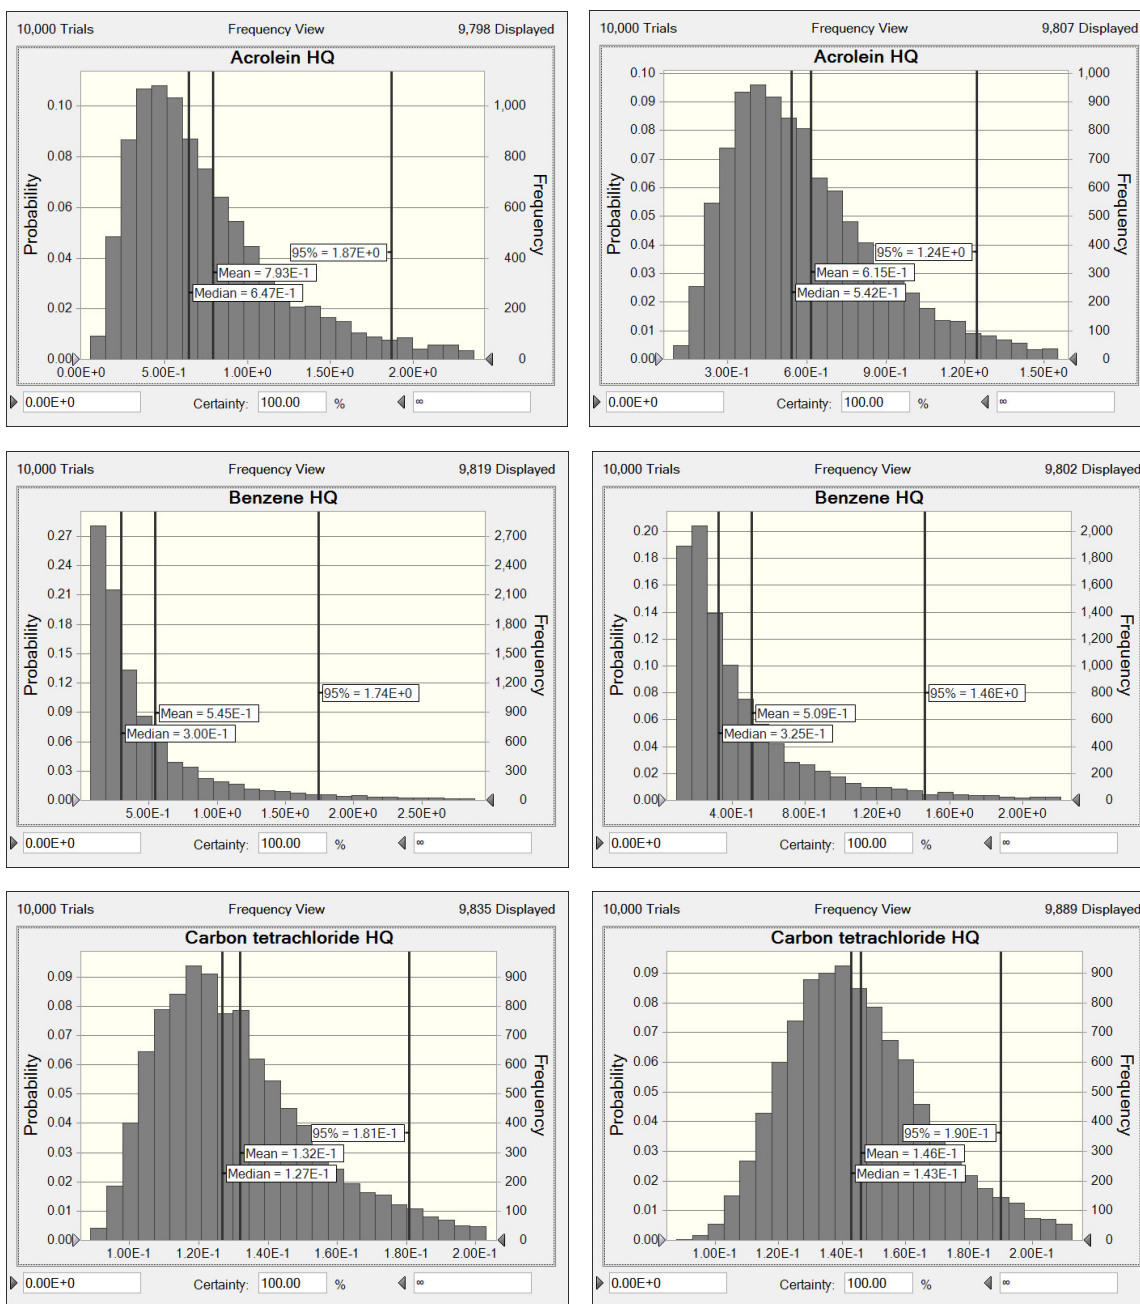

(a)

(b)

**Figure S5.** Probability distribution of HQ of selected VOC species during (a) P1 and (b) P2.
